# Supplementary material
Source: ML conference proceedings conference paper supplement (https://proceedings.neurips.cc/paper_files/paper/2019/hash/5c8cb735a1ce65dac514233cbd5576d6-Abstract.html)
Supplement: Supplementary file [file 5c8cb735a1ce65dac514233cbd5576d6-Supplemental.zip]

---

# MVS Supplementary Materials

---

**Bulat Ibragimov**  
Yandex, Moscow, Russia  
Moscow Institute of Physics and Technology  
ibrbulat@yandex.ru

**Gleb Gusev**  
Sberbank\*, Moscow, Russia  
gusev.g.g@sberbank.ru

## 1 Proof of Theorem 1

*Proof.* We estimate the expectation by representing  $\hat{S}(f, v)$  as the function  $F(x_1, y_1, \dots, x_{|L|}, y_{|L|}) := \sum_{l=1}^{|L|} \frac{x_l^2}{y_l}$ .

We use the first-order Taylor series expansion of  $F$  at the point  $(\mu_{x_1}, \mu_{y_1}, \dots, \mu_{x_{|L|}}, \mu_{y_{|L|}})$ , where  $\mu_{x_l} = \mathbb{E}x_l = \sum_{i \in l} g_i$  and  $\mu_{y_l} = \mathbb{E}y_l = \sum_{i \in l} h_i$ .

Without loss of generality, we further provide calculations for the case  $|L| = 1$ .

We have  $F(x_1, y_1) \approx F(\mu_{x_1}, \mu_{y_1}) + 2\frac{\mu_{x_1}}{\mu_{y_1}}(x_1 - \mu_{x_1}) - \frac{\mu_{x_1}^2}{\mu_{y_1}^2}(y_1 - \mu_{y_1})$ , and, therefore,  $\Delta = F(x_1, y_1) - F(\mu_{x_1}, \mu_{y_1}) \approx 2\frac{\mu_{x_1}}{\mu_{y_1}}(x_1 - \mu_{x_1}) - \frac{\mu_{x_1}^2}{\mu_{y_1}^2}(y_1 - \mu_{y_1})$ .

Further, we have

$$\mathbb{E}\Delta^2 \approx \mathbb{E}\left(2\frac{\mu_{x_1}}{\mu_{y_1}}(x_1 - \mu_{x_1}) - \frac{\mu_{x_1}^2}{\mu_{y_1}^2}(y_1 - \mu_{y_1})\right)^2 = c_1^2(4\text{Var}(x_1) - 4c_1\text{Cov}(x_1, y_1) + c_1^2\text{Var}(y_1)).$$

□

## 2 Proof of Theorem 2

*Proof.* Our goal is to find solution to the optimization problem:

$$\sum_{i=1}^N \frac{1}{p_i} g_i^2 + \lambda \sum_{i=1}^N \frac{1}{p_i} h_i^2 \rightarrow \min_{p_i}, \quad \text{w.r.t.} \quad \sum_{i=1}^N p_i = N \cdot s \quad \text{and} \quad \forall i \, p_i \in [0, 1]. \quad (1)$$

Lagrange function for this problem has form:

$$\mathcal{L} = \sum_{i=1}^N \frac{1}{p_i} g_i^2 + \lambda \sum_{i=1}^N \frac{1}{p_i} h_i^2 + \gamma \left( \sum_{i=1}^N p_i - N \cdot s \right) - \sum_{i=1}^N \tau_i p_i - \sum_{i=1}^N \eta_i (1 - p_i), \quad \tau_i \geq 0, \eta_i \geq 0, \forall i \quad (2)$$

Necessary conditions for solution of 1 are set by Karush–Kuhn–Tucker conditions:

$$\begin{cases} \frac{\partial \mathcal{L}}{\partial p_i} = -\frac{g_i^2}{p_i^2} - \lambda \frac{h_i^2}{p_i^2} + \gamma - \tau_i + \eta_i = 0, \forall i \\ \tau_i p_i = 0, \forall i \\ \eta_i (1 - p_i) = 0, \forall i \end{cases} \quad (3)$$

---

\*The study was done while working at Yandex

Analyzing these conditions, it is easy to conclude that optimal solution has the following properties.

1. Since every  $p_i > 0$ ,  $\tau_i = 0$ ,  $\forall i$ .
2. If  $\eta_i > 0$ , then  $p_i = 1$  and  $g_i^2 + \lambda h_i^2 = \gamma + \eta_i > \gamma$ .
3. If  $\eta_i = 0$ , then  $p_i = \frac{\sqrt{g_i^2 + \lambda h_i^2}}{\sqrt{\gamma}} \leq 1$

Putting all together, there exists a threshold  $\sqrt{\gamma}$ , which divides sample into two parts:  $\{x_i : \sqrt{g_i^2 + \lambda h_i^2} > \sqrt{\gamma}\}$  of size  $k(\gamma)$  with  $p_i = 1$  and  $\{x_i : \sqrt{g_i^2 + \lambda h_i^2} \leq \sqrt{\gamma}\}$  of size  $N - k(\gamma)$  with  $p_i = \frac{\sqrt{g_i^2 + \lambda h_i^2}}{\sqrt{\gamma}}$ .

Therefore, it is sufficient to find  $\gamma = \gamma^*$ , such that  $\sum_{i=1}^N p_i = N \cdot s$ . Desired value of  $\gamma^*$  can be found as a solution of:

$$\sum_{i=1}^N p_i = \sum_{i=1}^{N-k(\gamma)} \sqrt{\frac{g_i^2 + \lambda h_i^2}{\gamma}} + k(\gamma) = N \cdot s \quad (4)$$

Existence and uniqueness of solution for  $s \in [0, 1]$  follows from the monotonous decrease of the left side of equation as a function of  $\gamma$ .

Setting  $\mu = \sqrt{\gamma^*}$  finishes the proof.  $\square$

### 3 Experiments

We use grid search with 5-fold cross validation to find the best sampling parameters for each algorithm and sampling ratio. For MVS it is a logspace grid on  $[10^{-6}, 10^3]$  for  $\lambda$  parameter and  $\{5 : 1, 4 : 1, 2 : 1, 1 : 1, 1 : 2, 1 : 4, 1 : 5\}$  for large and small gradients ratio for GOSS. For other parameters we use tuned parameters from the publicly available benchmarks [1].

For the most visible demonstration of the superiority of MVS we place here charts of quality on sampling ratio dependence for every dataset from the main paper.

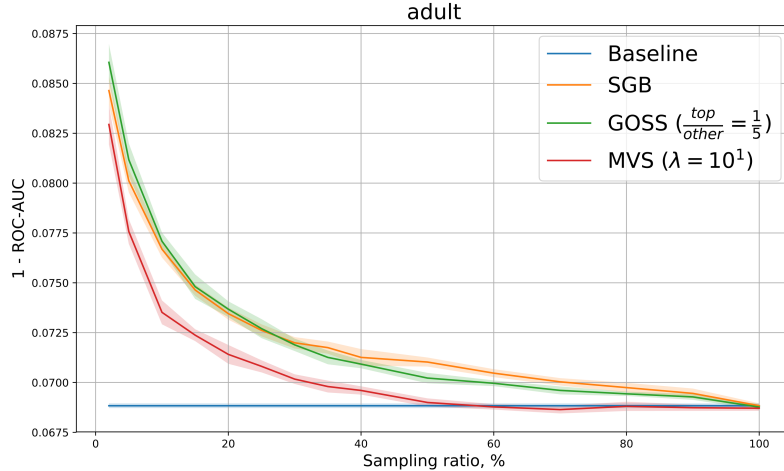

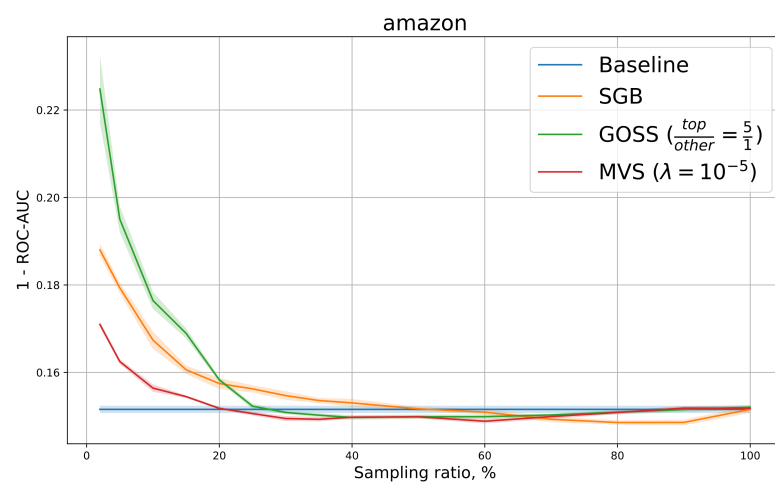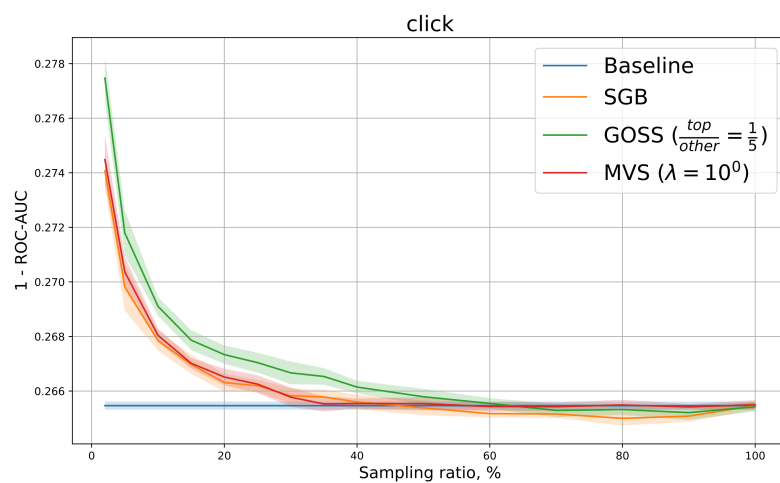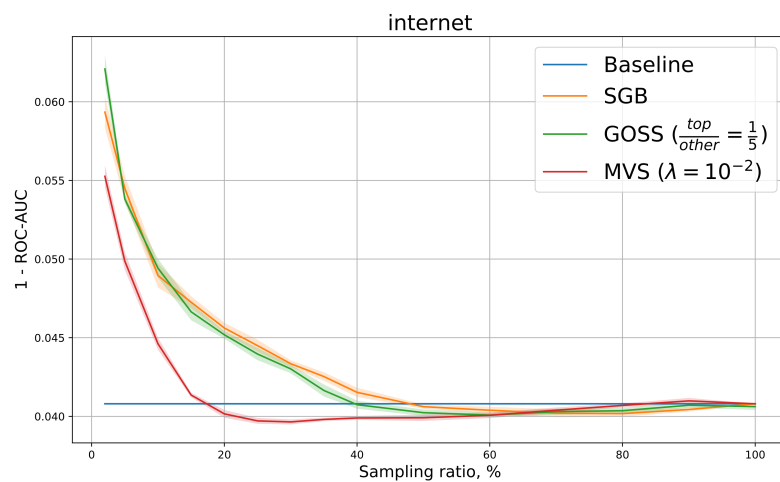

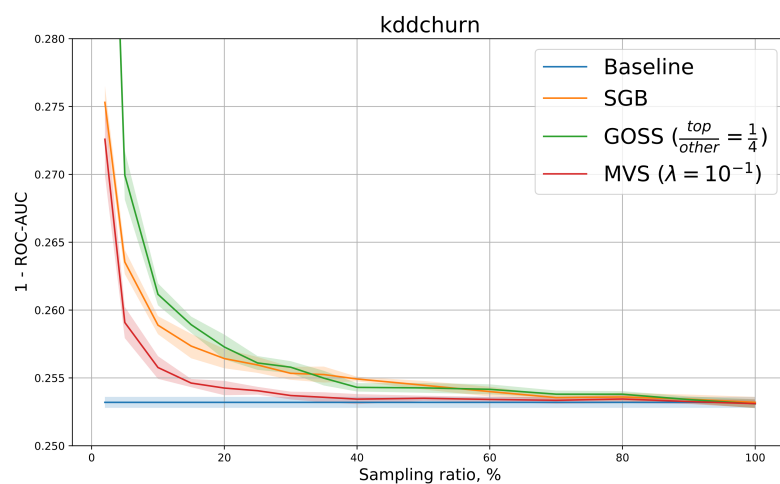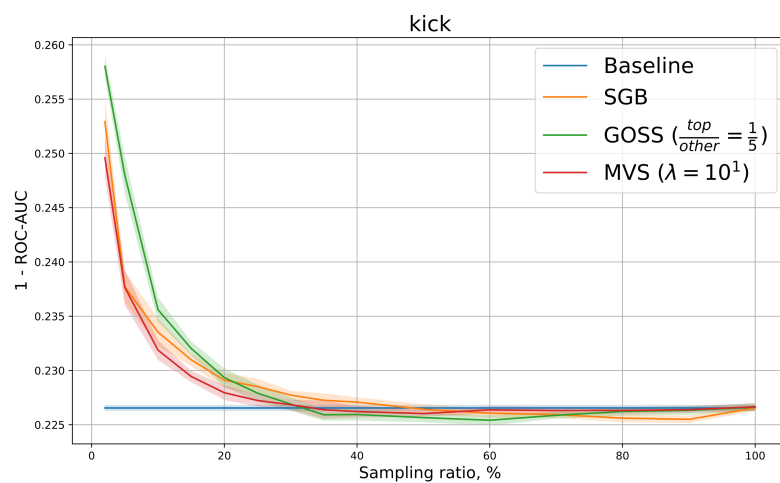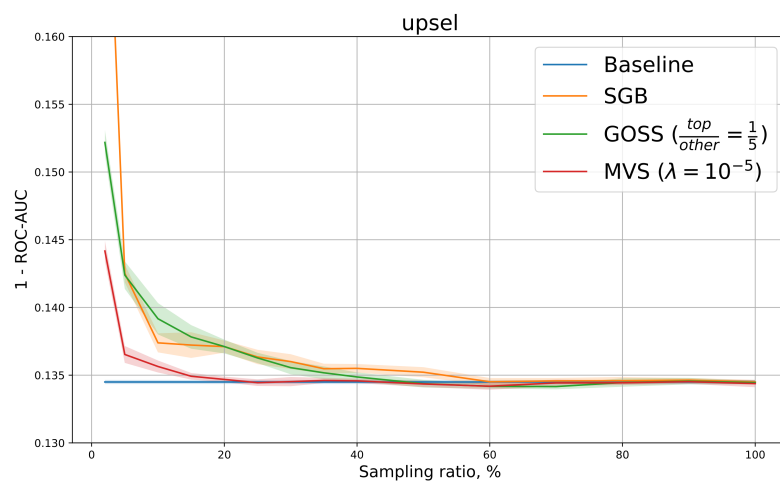

## References

- [1] Catboost. 2018. Data preprocessing. [https://github.com/catboost/catboost/tree/master/catboost/benchmarks/quality\\_benchmarks](https://github.com/catboost/catboost/tree/master/catboost/benchmarks/quality_benchmarks). (2018).
